# Supplementary material for: A novel process for high efficiency recovery of rare earth metals from waste phosphors using a sodium peroxide system
Source: Royal Society of Chemistry journal article supplement (doi:10.1039/c3ra46381h), 2014-01-01
Supplement: c3ra46381h.pdf [file c3ra46381h.pdf]

# Supporting Information

## **A novel process for high efficiency recovery of rare earth metals from waste phosphors using sodium peroxide system**

Yufeng Wu,<sup>†</sup> Baolei Wang<sup>†</sup>, Qijun Zhang,<sup>\*,†</sup> Ruiqing Li,<sup>‡</sup> and Jiamei Yu<sup>†</sup>

<sup>†</sup> Lab of Resources Saving & Recycling Technologies, Institute of Recycling Economy, Beijing University of Technology, Beijing, 100124, P. R. China.

<sup>‡</sup> College of Materials Science and Engineering, Beijing University of Technology, Beijing, 100124, P. R. China.

\*Corresponding Author, E-mail: zhangqijun@bjut.edu.cn. Fax: +86-10-67396234; Tel: +86-10-67396234;

Number of figures: 3

Number of pages: 4

Number of tables: 0

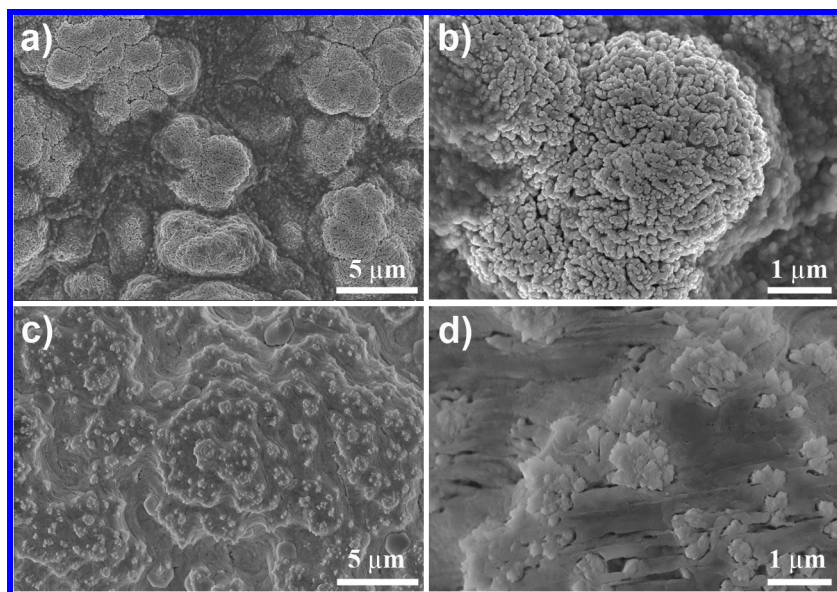

**Figure S1.** SEM images of (a) low-magnification and (b) high-magnification image of the mixture of waste and Na<sub>2</sub>O<sub>2</sub>; (c) low-magnification and (d) high-magnification image of the products synthesized by the Na<sub>2</sub>O<sub>2</sub> molten salt calcining process.

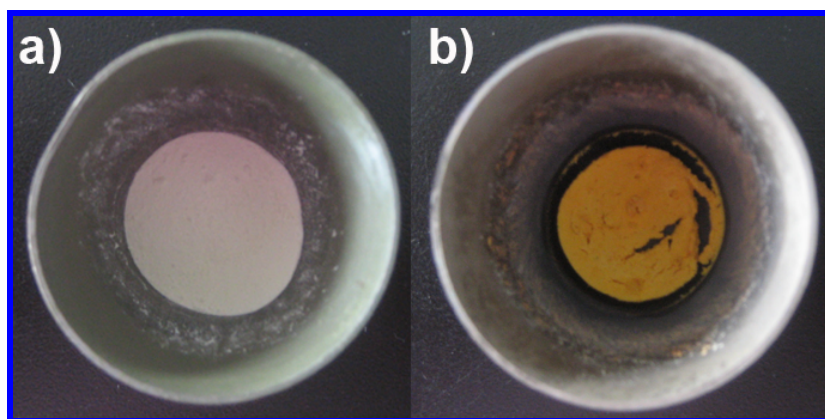

**Figure S2.** The photographs of (a) the mixture of waste and  $\text{Na}_2\text{O}_2$ ; and (b) the resulted products synthesized by the  $\text{Na}_2\text{O}_2$  molten salt calcining process.

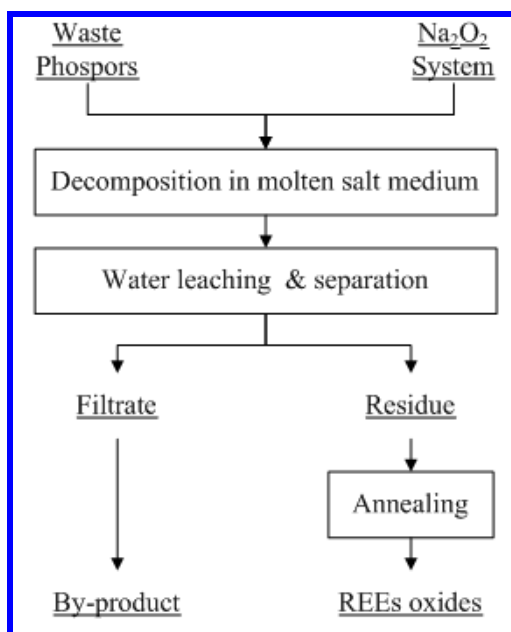

**Figure S3.** Conceptual flowsheet for recovery of REEs from waste phosphors.
